# Supplementary material for: High-sulfur-doped hard carbon for sodium-ion battery anodes with large capacity and high initial coulombic efficiency
Source: Royal Society of Chemistry journal article supplement (doi:10.1039/d2se00937d), 2022-01-01
Supplement: d2se00937d1.pdf [file d2se00937d1.pdf]

## Supplementary Materials

### High-sulfur-doped hard carbon for sodium-ion battery anode with large capacity and high initial Coulombic efficiency

BaoShan Wan<sup>a</sup>, Haiyan Zhang<sup>a,\*</sup>, Shuang Tang<sup>a</sup>, Shengkai Li<sup>a</sup>, Yan Wang<sup>a</sup>, Daofeng Wen<sup>a</sup>, Minglu Zhang<sup>a</sup>, Zhenghui Li<sup>a,\*</sup>

<sup>a</sup> School of Materials and Energy, Guangdong University of Technology, Guangzhou 510006, China

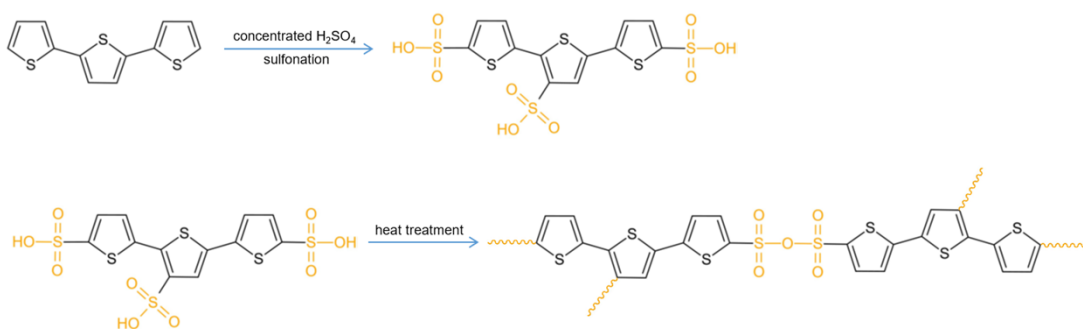

**Fig. S1.** A proposed reaction process for the synthesis of sulfonation reaction.

\* Corresponding author. E-mail: [hyzhang@gdut.edu.cn](mailto:hyzhang@gdut.edu.cn) (Haiyan Zhang); [lizhengh@gdut.edu.cn](mailto:lizhengh@gdut.edu.cn) (Zhenghui Li)

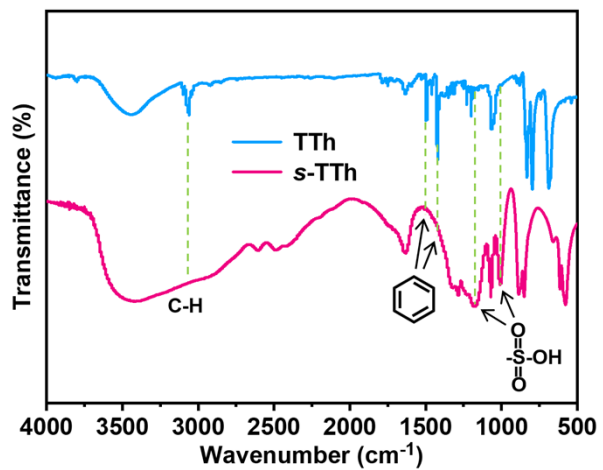

**Fig. S2.** FT-IR spectra of TTh and *s*-TTh.

**Fig. S3.** Narrow XPS spectra of *s*-TTh: (a) C1s narrow spectrum and (b) S2p narrow spectrum.

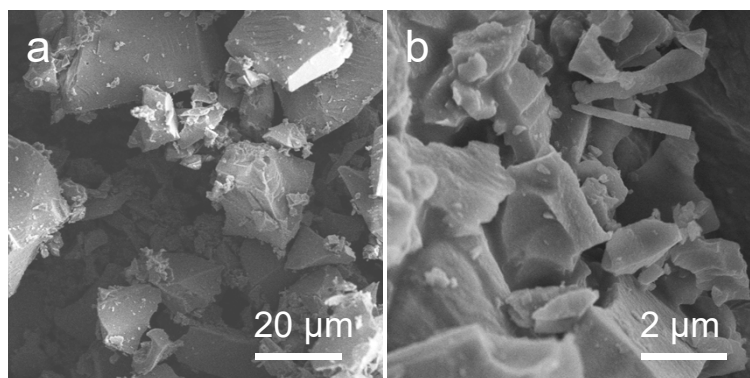

**Fig. S4.** (a, b) SEM images of SHC-500.

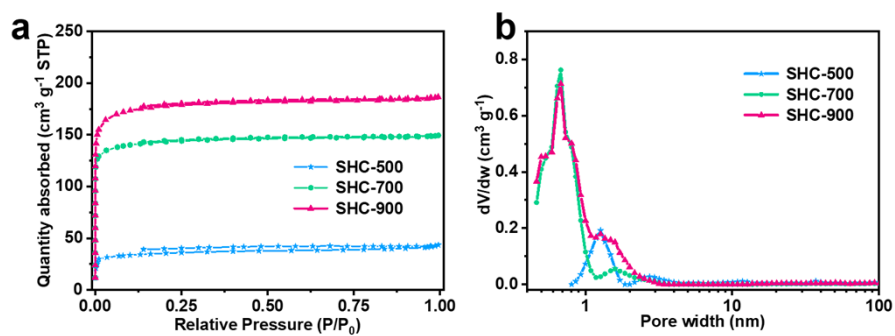

**Fig. S5.** (a)  $N_2$  adsorption–desorption isotherms and (b) NLDFT pore size distributions of obtained SHC samples.

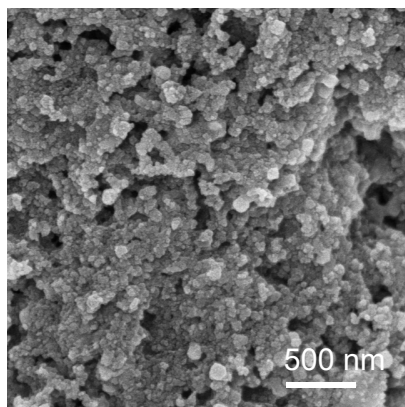

**Fig. S6.** SEM image of SHC-500 electrode after 100 cycles.

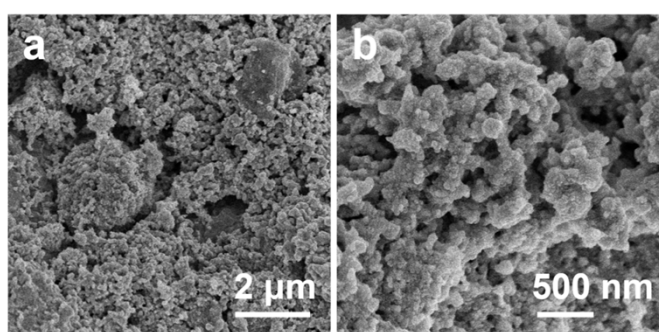

**Fig. S7.** (a, b) SEM images of SHC-500 electrode after 1000 cycles.

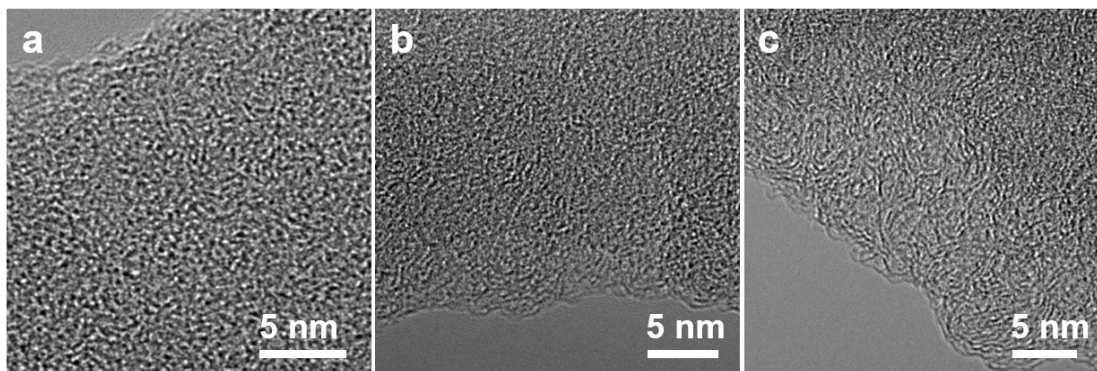

**Fig. S8.** TEM images of S-doped hard carbons prepared using Th-DS as starting materials: (a) Th-DS-500, (b) Th-DS-700 and (c) Th-DS-900.

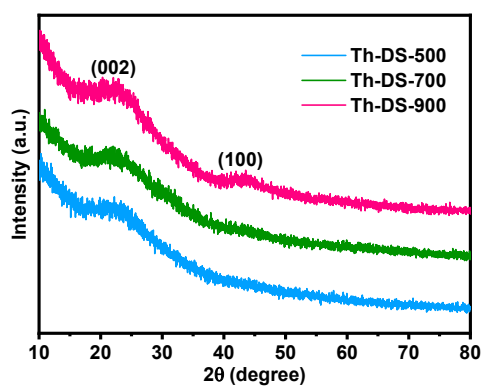

**Fig. S9.** XRD patterns of Th-DS-500, Th-DS-700 and Th-DS-900.

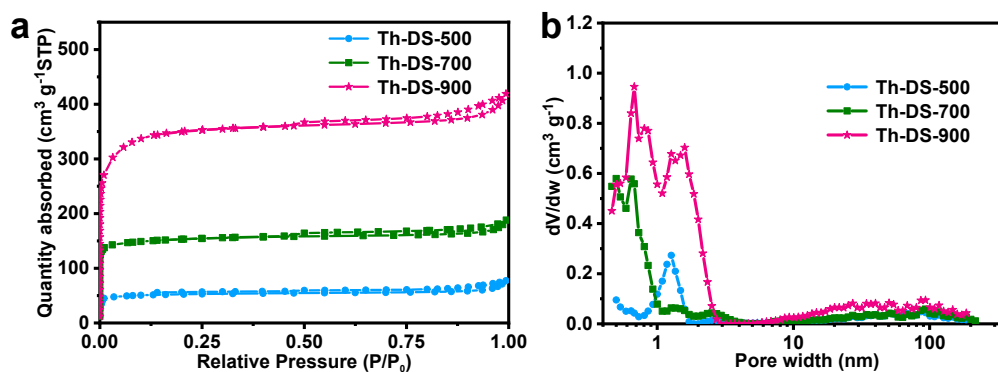

**Fig. S10.**  $N_2$  adsorption-desorption isotherms and NLDFT pore size distribution of S-doped hard carbons prepared using Th-DS as starting materials.

**Fig. S11.** Narrow XPS spectra of Th-DS-500: (a) C1s narrow spectrum and (b) S2p narrow spectrum.

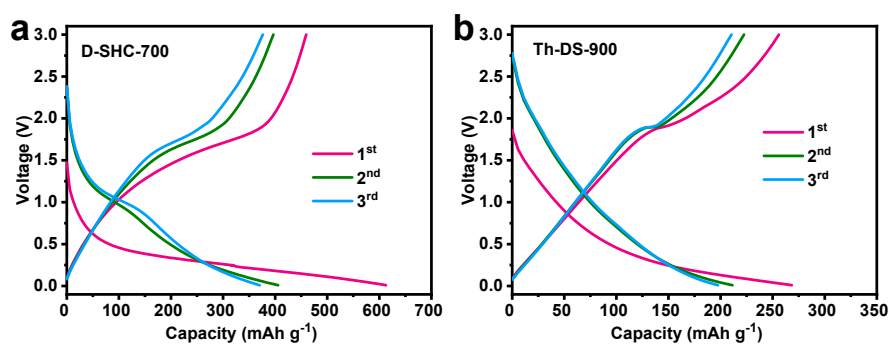

**Fig. S12.** (a, b) Galvanostatic charge/discharge profiles for the initial three cycles of Th-DS-700 and Th-DS-900.

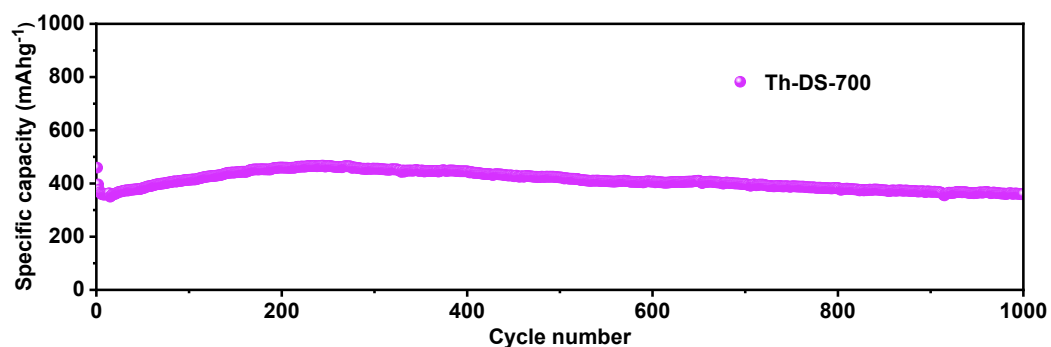

**Fig. S13.** Cycling performance of Th-DS-700 at a current density of 1 A g<sup>-1</sup>.

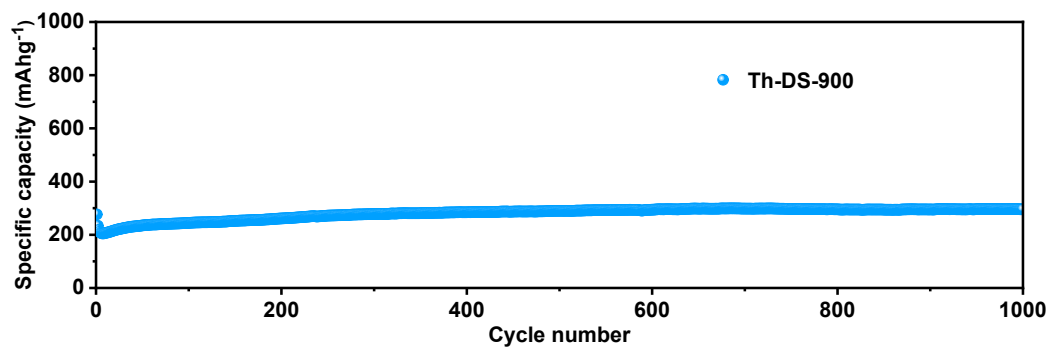

**Fig. S14.** Cycling performance of Th-DS-900 at a current density of  $1 \text{ A g}^{-1}$ .

**Table S1.** Sodium storage performance of recently reported S-doped carbons.

| Sample         | S content (%) | C ( $\text{mAh g}^{-1}$ ) |                        | ICE (%)     | Ref.             |
|----------------|---------------|---------------------------|------------------------|-------------|------------------|
|                |               | 1 <sup>st</sup> discharge | 1 <sup>st</sup> charge |             |                  |
| <b>SHC-500</b> | <b>15.91</b>  | <b>921</b>                | <b>777</b>             | <b>84.2</b> | <b>This work</b> |
| <b>SHC-700</b> | <b>5.67</b>   | <b>788</b>                | <b>667</b>             | <b>84.5</b> |                  |
| NSGHS          | 5.21          | 1000                      | 386                    | 38.6        | [1]              |
| KEC-600        | 8.22          | 900                       | 530                    | 58.9        | [2]              |
| OMCP-800-S10   | -             | -                         | 405                    | -           | [3]              |
| S-CNS          | 23            | 1211                      | 708                    | 58.4        | [4]              |
| SNCNF          | 2.3           | 790                       | 315                    | 39.9        | [5]              |
| 3DSC-700       | 20.1          | 1088                      | 526                    | 48.4        | [6]              |
| S-SG           | 21.8          | 878                       | 488                    | 55.6        | [7]              |
| S-HC-p         | 6.3           | 870                       | 488                    | 56.1        | [8]              |
| DC-S           | 26.9          | 887                       | 561                    | 63.2        | [9]              |

|        |      |     |     |      |      |
|--------|------|-----|-----|------|------|
| SC     | 15.2 | 655 | 482 | 73.6 | [10] |
| SFG    | 16.7 | 676 | 330 | 48.8 | [11] |
| SN-HCS | 0.55 | 890 | 260 | 29.2 | [12] |

## References

- 1 W. Chen, X. Chen, R. Qiao, Z. Jiang, Z.-j. Jiang, S. Papović, K. Raleva, D. Zhou, *Carbon* 2022, **187**, 230-240.
- 2 X. Luo, L. Ma, Z. Li, X. Zhao, Y. Dong, Q. Yang, H. Liu, B. Wang, L. Zhi, Z. Xiao, *Journal of Materials Chemistry A* 2021, **9**, 24460-24471.
- 3 Z. Li, Y. Cao, G. Li, L. Chen, W. Xu, M. Zhou, B. He, W. Wang, Z. Hou, *Electrochimica Acta* 2021, **366**, 137466.
- 4 G. Zhao, D. Yu, H. Zhang, F. Sun, J. Li, L. Zhu, L. Sun, M. Yu, F. Besenbacher, Y. Sun, *Nano Energy* 2020, **67**, 104219.
- 5 M. Yu, Z. Yin, G. Yan, Z. Wang, H. Guo, G. Li, Y. Liu, L. Li, J. Wang, *Journal of Power Sources* 2020, **449**, 227514.
- 6 W. Zhong, X. Lv, Q. Chen, M. Ren, W. Liu, G. Li, J. Yu, M. Li, Y. Dai, L. Wang, *ACS applied materials & interfaces* 2019, **11**, 37850-37858.
- 7 B. Quan, A. Jin, S. H. Yu, S. M. Kang, J. Jeong, H. D. Abruna, L. Jin, Y. Piao, Y. E. Sung, *Adv Sci (Weinh)* 2018, **5**, 1700880.
- 8 Z. Hong, Y. Zhen, Y. Ruan, M. Kang, K. Zhou, J. M. Zhang, Z. Huang, M. Wei, *Adv Mater* 2018, e1802035.
- 9 W. Li, M. Zhou, H. Li, K. Wang, S. Cheng, K. Jiang, *Energy & Environmental Science* 2015, **8**, 2916-2921.
- 10 L. Qie, W. Chen, X. Xiong, C. Hu, F. Zou, P. Hu, Y. Huang, *Adv Sci (Weinh)* 2015, **2**, 1500195.
- 11 X. Deng, K. Xie, L. Li, W. Zhou, J. Sunarso, Z. Shao, *Carbon* 2016, **107**, 67-73.
- 12 J. Ye, J. Zang, Z. Tian, M. Zheng, Q. Dong, *Journal of Materials Chemistry A* 2016, **4**, 13223-13227.
